# Supplementary material for: Persistent Dissociation and Its Neural Correlates in Predicting Outcomes After Trauma Exposure
Source: Atypon-hosted journal article supplement (doi:10.1176/appi.ajp.21090911), 2022-06-22
Supplement: ajp_21090911_correction01.pdf [file ajp_21090911_correction01.pdf]

## **Correction to Lebois et al.**

When the article “Persistent Dissociation and Its Neural Correlates in Predicting Outcomes After Trauma Exposure,” by Lauren A.M. Lebois, Ph.D., et al. (doi: 10.1176/appi.ajp.21090911) was published online on June 22, 2022, one of the column headings in Table 4 was incorrect. The table was corrected and the article was reposted online on June 27, 2022.
